# Supplementary material for: Supported ammonia borane decomposition through enhanced homopolar B–B coupling
Source: Royal Society of Chemistry journal article supplement (doi:10.1039/c8dt00789f), 2018-01-01
Supplement: c8dt00789f1.pdf [file c8dt00789f1.pdf]

## Supplementary information

### Supported ammonia borane decomposition through enhanced homopolar B-B coupling

Binayak Roy<sup>a</sup>, Animesh Hajari<sup>a</sup>, Joydev Manna<sup>a</sup>, Pratibha Sharma<sup>\*a</sup>

\*Corresponding author

<sup>a</sup>Department of Energy Science and Engineering, Indian Institute of Technology Bombay, Mumbai 400076, India

e-mail: pratibha\_sharma@iitb.ac.in

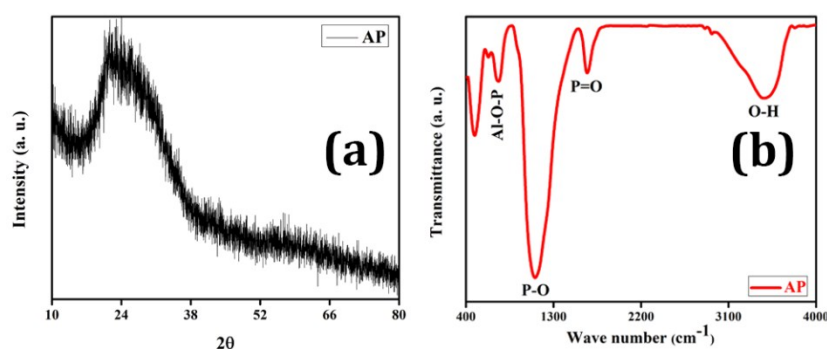

Figure S1: (a) XRD and (b) FTIR of the synthesized  $\text{AlPO}_4$  support material

Table S1: FTIR frequencies for synthesized Aluminium phosphate (AP)

| Bonding Vibration | Vibrational frequency ( $\text{cm}^{-1}$ ) |
|-------------------|--------------------------------------------|
| Al-O-P Vibrations | 494, 732                                   |
| P-O stretching    | 1111                                       |
| P=O stretching    | 1645                                       |

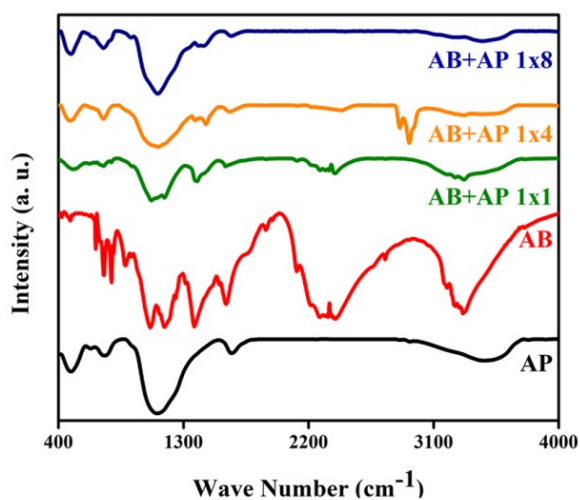

Figure S2: FTIR spectra of AB+AP samples

Table S2: FTIR vibrational frequencies of AB<sup>1</sup>

| Vibrational frequencies (cm <sup>-1</sup> ) | FTIR Peak Annotation                           |
|---------------------------------------------|------------------------------------------------|
| 603                                         | NBH Rocking                                    |
| 968                                         | <sup>11</sup> B-N Stretching (A <sub>1</sub> ) |
| 987                                         | <sup>10</sup> B-N Stretching (A <sub>1</sub> ) |
| 1175                                        | BH <sub>3</sub> deformation (A <sub>1</sub> )  |
| 1186                                        | BH <sub>3</sub> deformation (E)                |
| 1377                                        | Unassigned                                     |
| 1396                                        | Unassigned                                     |
| 1608                                        | NH <sub>3</sub> deformation                    |
| 2340                                        | Sym. B-H stretching (A <sub>1</sub> )          |
| 2415                                        | Assym. B-H stretching (E)                      |
| 3177                                        | Unassigned suggested (overtone)                |
| 3337                                        | Sym. N-H Stretching(A <sub>1</sub> )           |
| 3386                                        | Asym. N-H stretching (E)                       |

Table S3: AUC comparison of peaks observed in <sup>11</sup>B spectra of pure AB and AB+AP 1×1

|                  | Pure AB@10 (%) | AB+AP(1×1)@10 (%) |
|------------------|----------------|-------------------|
| Peak 1 (30 ppm)  | 82.17          | 61.17             |
| Peak 2 (24 ppm)  | 6.26           | 21.54             |
| Peak 3 (6.4 ppm) | 11.56          | 17.28             |

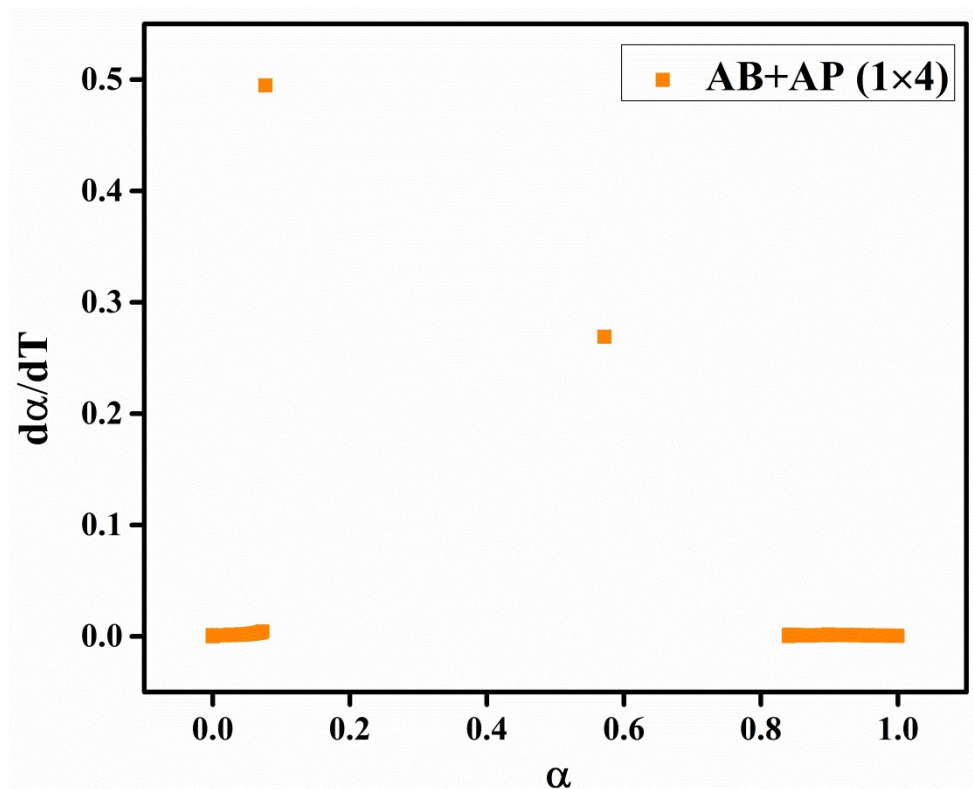

Figure S3: Kinetic data for AB+AP(1×4)@10 thermal decomposition

Table S4: Avrami Erofe'ev model fitting parameters

|             | $n$               | $k$                 | $Adj. R^2$ |
|-------------|-------------------|---------------------|------------|
| Pure AB     | $5 \pm 5.76$      | $0.016 \pm 0.015$   | 0.42       |
| AB+AP (1×1) | $4.67 \pm 0.58$   | $0.044 \pm 0.00513$ | 0.925      |
| AB+AP (1×4) | $2.308 \pm 0.156$ | $0.059 \pm 0.0033$  | 0.921      |

## References

1. Xie, S., Song, Y. & Liu, Z. In situ high-pressure study of ammonia borane by Raman and IR spectroscopy. *Can. J. Chem.* **87**, 1235–1247 (2009).
